# Supplementary material for: Dynamic bTMB combined with residual ctDNA improves survival prediction in locally advanced NSCLC patients with chemoradiotherapy and consolidation immunotherapy
Source: PubMed Central journal article supplement — J Natl Cancer Cent. 2024 Apr 10;4(2):177–87. doi: 10.1016/j.jncc.2024.01.008 (PMC11390629; doi:10.1016/j.jncc.2024.01.008), 2024-04-10
Supplement: mmc1.pdf [file mmc1.pdf]

**Dynamic bTMB combined with residual ctDNA improves survival prediction in locally advanced NSCLC patients with chemoradiotherapy and consolidation immunotherapy**

Yu Wang, Wenqing Wang, Tao Zhang, Yin Yang, Jianyang Wang, Canjun Li, Xin Xu, Yuqi Wu, Ying Jiang, Jinghao Duan, Luhua Wang, Nan Bi

# Supplementary materials

## Supplementary figures

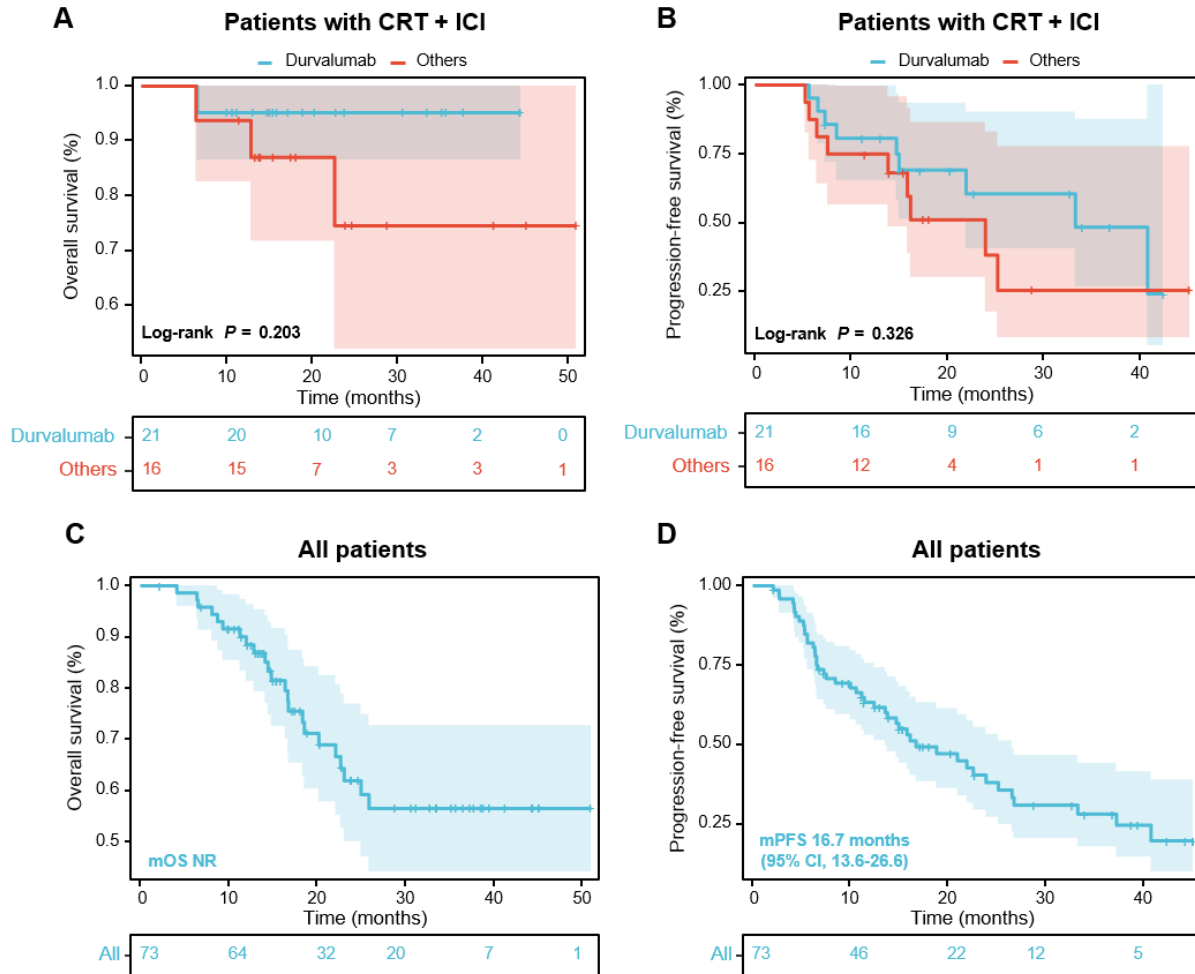

**Supplementary Fig. 1.** Survival outcomes for patients treated with consolidation durvalumab versus other agents in the discovery cohort. Kaplan-Meier curves of overall survival (A) and progression-free survival (B) for patients treated with consolidation durvalumab versus other ICI agents. Overall survival (C) and progression-free survival (D) for all patients in the discovery set. CI, confidence interval; CRT, chemoradiotherapy; ICI, immune checkpoint inhibitor; mOS, median overall survival; mPFS, median progression-free survival; NR, not reached.

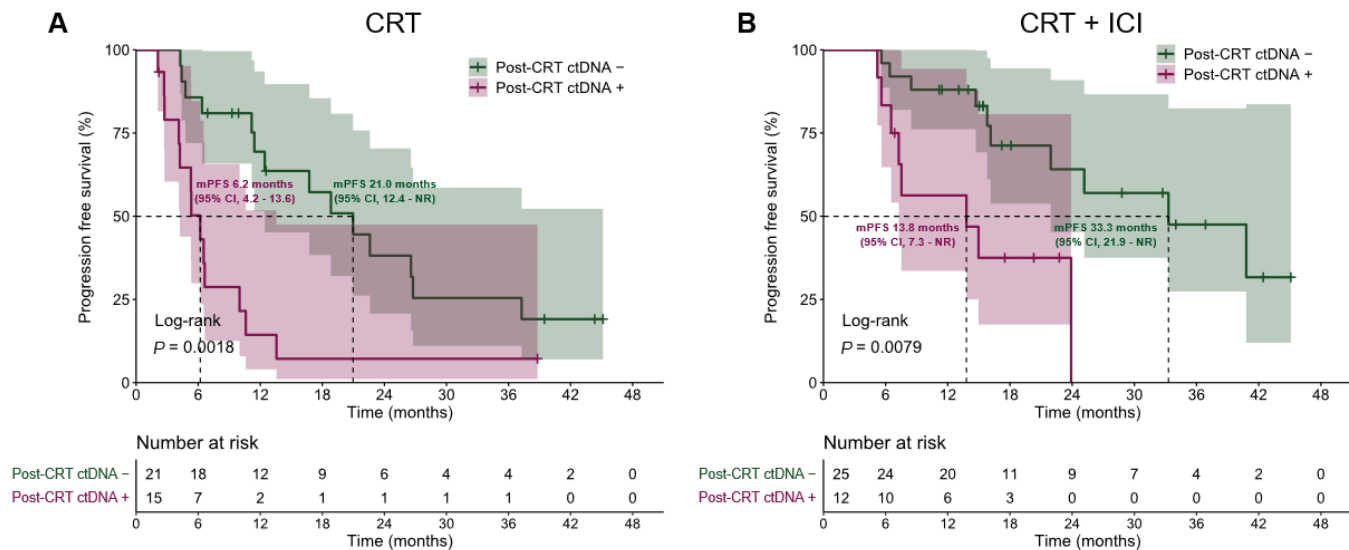

**Supplementary Fig. 2.** The predictive effect of post-CRT residual ctDNA detection on survival in patients with or without consolidation ICI. In the discovery set, residual ctDNA after CRT was associated with significantly shorter progression-free survival for patients treated with CRT alone (A) or treated with CRT + consolidation ICI (B). CI, confidence interval; CRT, chemoradiotherapy; ctDNA, circulating tumor DNA; ICI, immune checkpoint inhibitor; mPFS, median progression-free survival; NR, not reached.

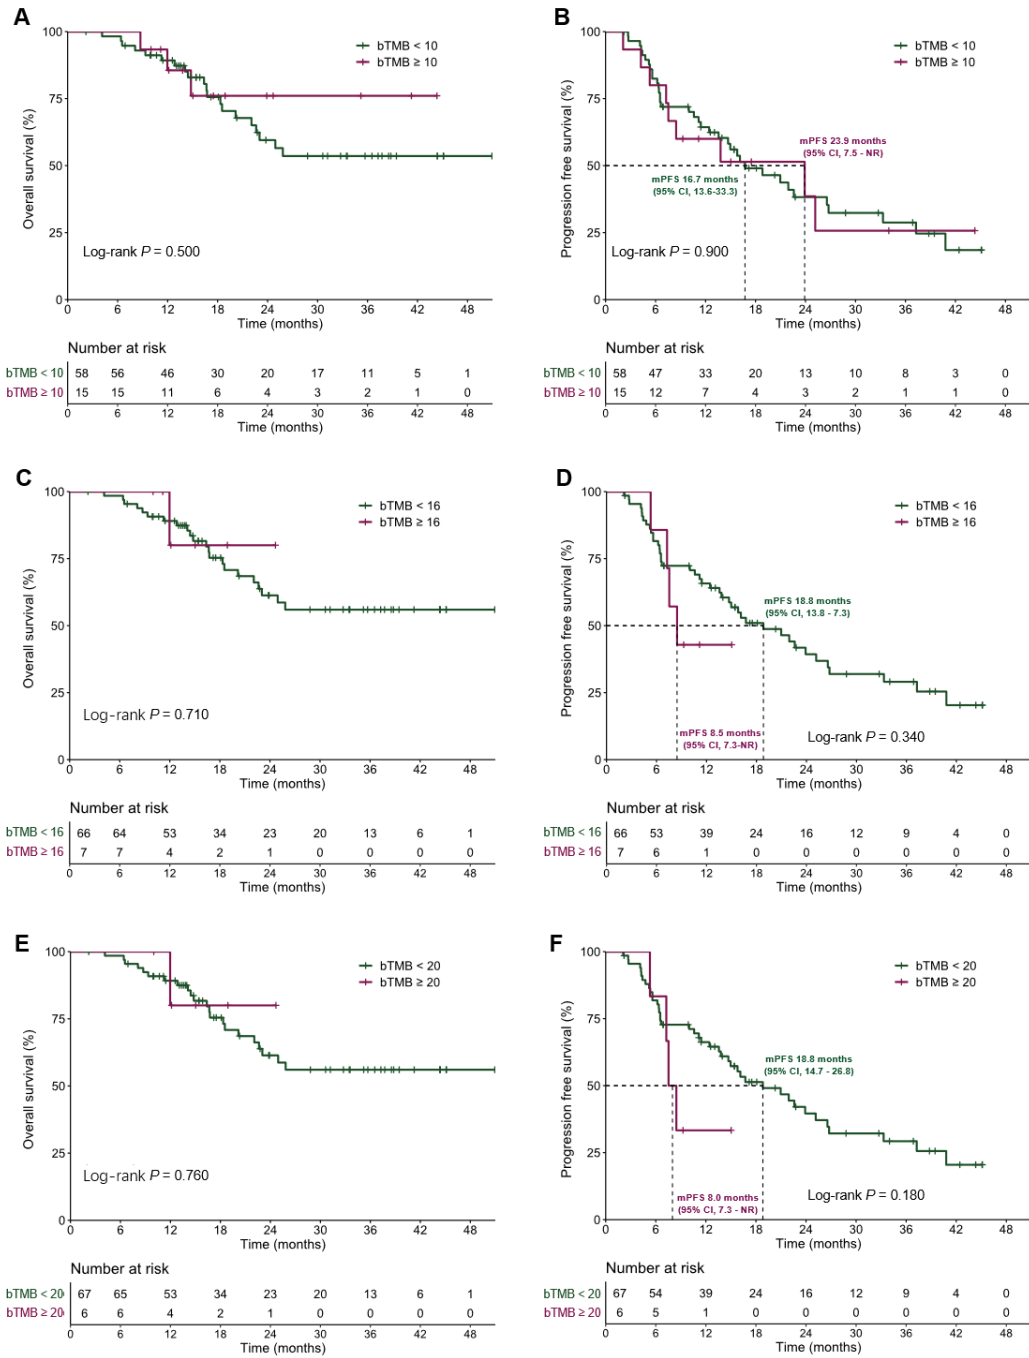

**Supplementary Fig. 3.** Baseline bTMB at various cutoffs failed to predict survival. No significant differences in overall survival or progression-free survival stratified by baseline bTMB at cutoff values of 10 mut/Mb (A, B), 16 mut/Mb (C, D), and 20 mut/Mb (E, F). bTMB, blood tumor mutational burden; CI, confidence interval; mPFS, median progression-free survival.

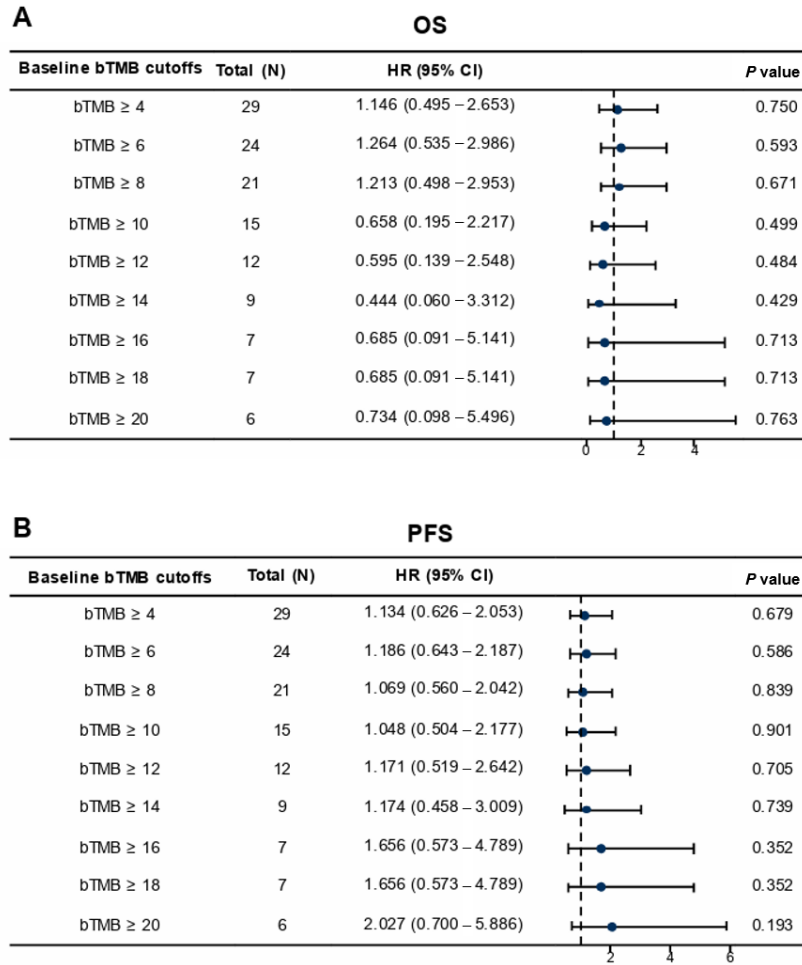

**Supplementary Fig. 4.** Forest plots for Cox proportional hazards regression analysis. Baseline bTMB at the cutoff points ranging from 4 to 22 mut/Mb was not predictive of overall survival (A) or progression-free survival (B). bTMB, blood tumor mutational burden; CI, confidence interval; HR, hazard ratio; N, number; OS, overall survival; PFS, progression-free survival.

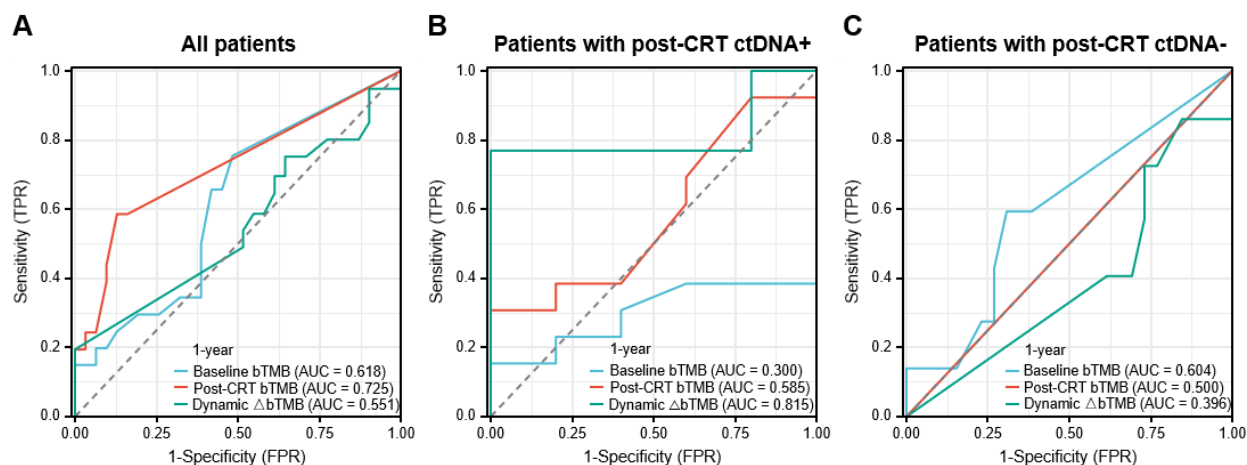

**Supplementary Fig. 5.** The predictive effect of dynamic  $\Delta$ bTMB in the discovery set. (A) Time-dependent receiver operating characteristic curves showed, neither baseline bTMB, nor post-CRT bTMB, nor  $\Delta$ bTMB levels, could effectively predict progression-free survival of patients in the discovery set (none of them with AUC > 0.75). However,  $\Delta$ bTMB (AUC = 0.815) was predictive of survival in patients with residual ctDNA (B), rather than in patients with ctDNA clearance (C). AUC, area under the curve; bTMB, blood tumor mutational burden; CRT, chemoradiotherapy; ctDNA, circulating tumor DNA; FPR, false positive rate; TPR, true positive rate.

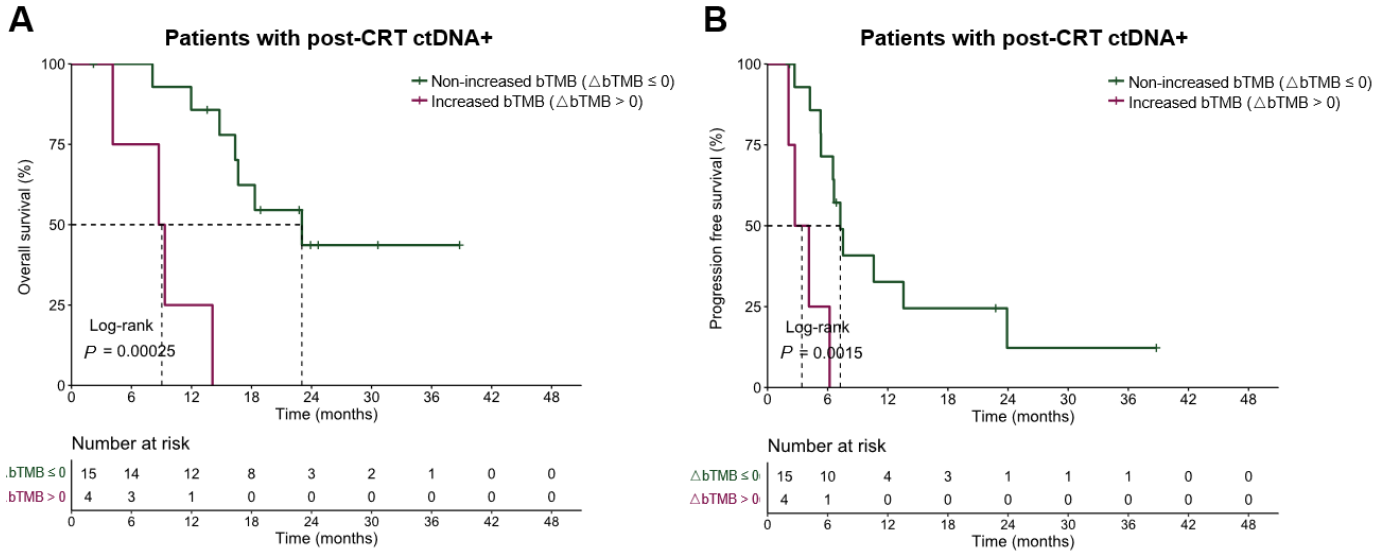

**Supplementary Fig. 6.** Dynamic  $\Delta$ bTMB was an independent stratification factor of post-CRT ctDNA prediction. For patients with residual ctDNA after CRT, increased bTMB ( $\Delta$ bTMB  $> 0$ ) could further identify patients with significantly poorer overall survival (A) and progression-free survival (B). bTMB, blood tumor mutational burden; CRT, chemoradiotherapy; ctDNA, circulating tumor DNA.

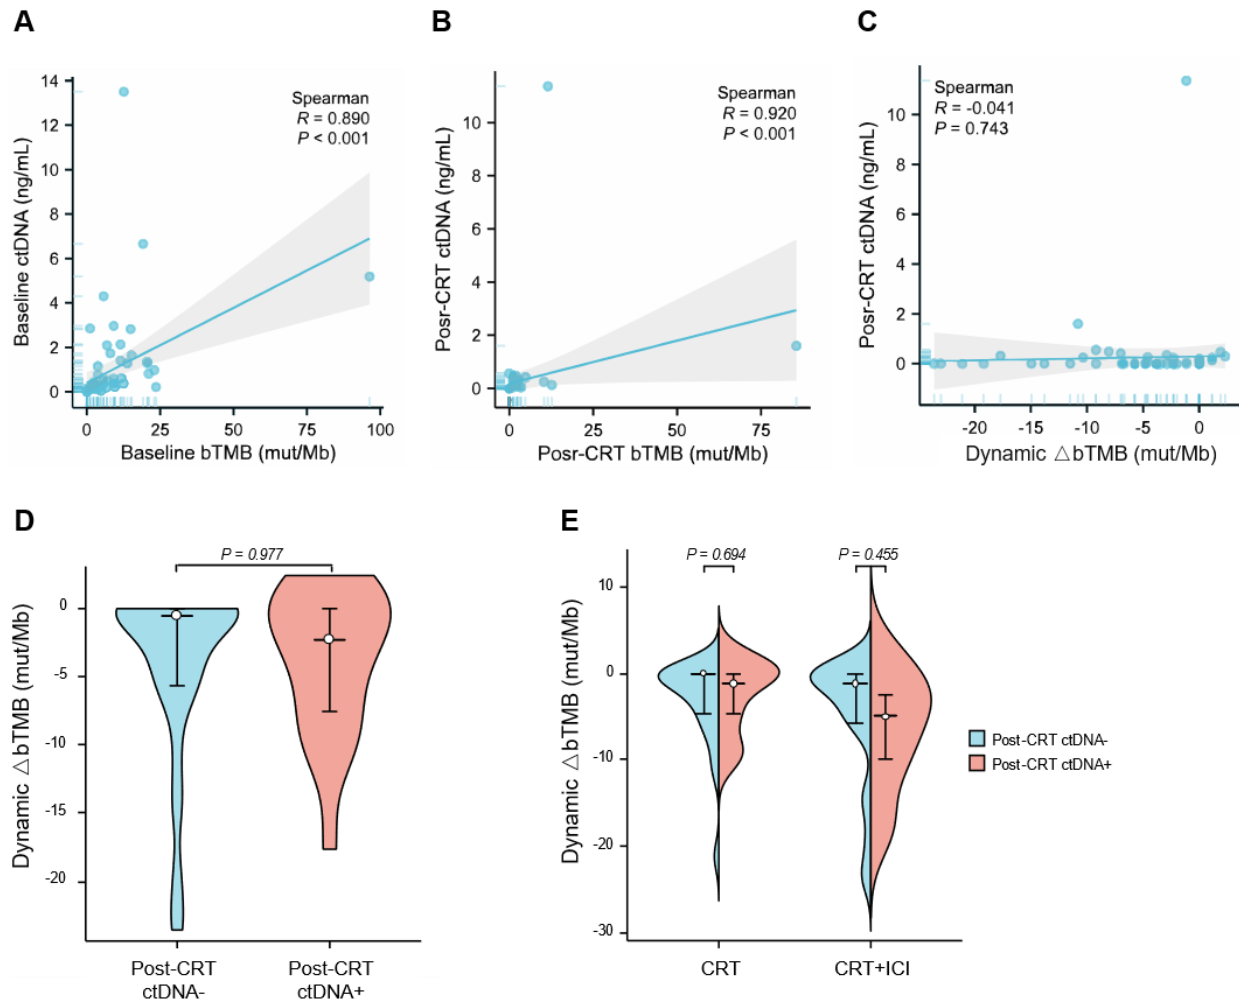

**Supplementary Fig. 7.** Dynamic  $\Delta$ bTMB was independent of post-CRT ctDNA. Scatter plots and linear fits of Spearman's correlation tests showing the strong correlation between baseline bTMB and baseline ctDNA levels (A), and between post-CRT bTMB and post-CRT ctDNA levels (B), but the negligible correlation between  $\Delta$ bTMB and post-CRT ctDNA levels (C). No significant correlation between  $\Delta$ bTMB and post-CRT ctDNA status (D), in both the CRT and the CRT + ICI cohorts (E). bTMB, blood tumor mutational burden; CRT, chemoradiotherapy; ctDNA, circulating tumor DNA; ICI, immune checkpoint inhibitor.



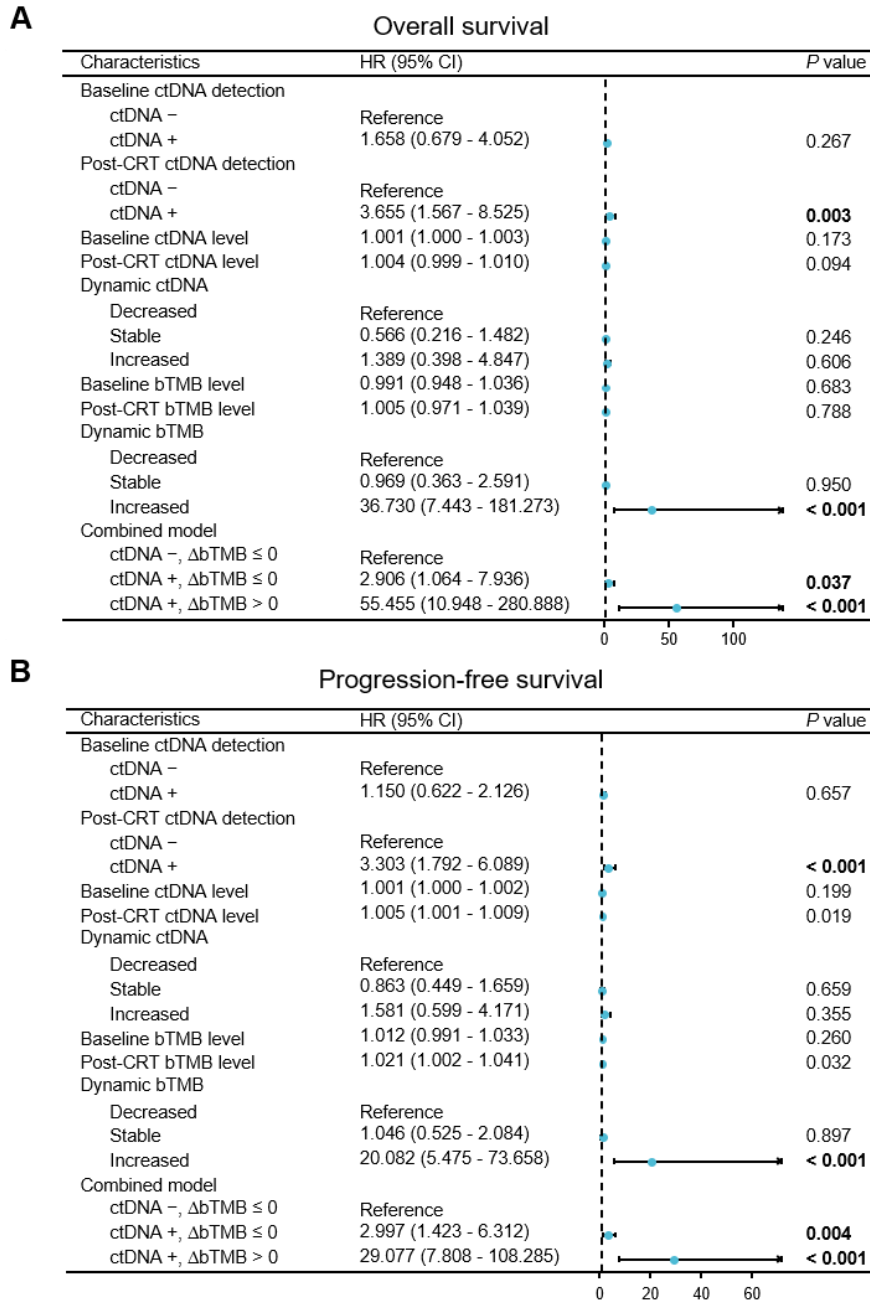

**Supplementary Fig. 8.** Forest plots for univariate Cox proportional hazards regression analysis. Combining post-CRT ctDNA detection with dynamic  $\Delta$ bTMB could significantly differentiate survival outcomes into 3 groups. Patients with residual ctDNA plus increased  $\Delta$ bTMB had significantly worse overall survival (A) and progression-free survival (B). bTMB, blood tumor mutational burden; CI, confidence interval; CRT, chemoradiotherapy; ctDNA, circulating tumor DNA; HR, hazard ratio.

## Supplementary tables

**Supplementary Table 1.** 486 cancer-related genes in next-generation sequencing panel.

|          |           |          |        |          |          |         |         |           |
|----------|-----------|----------|--------|----------|----------|---------|---------|-----------|
| ABCB1    | ABCC2     | ABL1     | ADH1B  | AIP      | AKT1     | AKT2    | AKT3    | TET2      |
| ALDH2    | ALK       | AMER1    | APC    | APEX1    | AR       | ARAF    | ARID1A  | TFG       |
| ARID1B   | ARID2     | ARID5B   | ASCL4  | ASXL1    | ATF1     | ATIC    | ATM     | THADA     |
| ATR      | ATRX      | AURKA    | AURKB  | AXIN2    | AXL      | B2M     | BAD     | TNF       |
| BAI3     | BAK1      | BAP1     | BARD1  | BAX      | BCL2     | BCL2L1  | BCL2L11 | TNFAIP3   |
| BCL3     | BCR       | BIRC3    | BLM    | BMPR1A   | BRAF     | BRCA1   | BRCA2   | TNFRSF11A |
| BRD4     | BRIP1     | BTG2     | BTK    | BUB1B    | c11orf30 | CASP8   | CBL     | TMEM127   |
| CBLB     | CCND1     | CCNE1    | CD274  | CD74     | CDA      | CDC73   | CDH1    | TMEM167A  |
| CDK10    | CDK12     | CDK4     | CDK6   | CDK8     | CDKN1A   | CDKN1B  | CDKN1C  | TMPRSS2   |
| CDKN2A   | CDKN2B    | CDKN2C   | CEBPA  | CEP57    | CHD4     | CHD8    | CHEK1   | TNFRSF14  |
| CHEK2    | CREBBP    | CRKL     | CSF1R  | CTCF     | CTLA4    | CTNNB1  | CUL3    | TNFRSF19  |
| CUX1     | CXCL8     | CXCR4    | CYLD   | CYP19A1  | CYP2A13  | CYP2A6  | CYP2A7  | TNFRSF1B  |
| CYP2B6*6 | CYP2C19*2 | CYP2C9*3 | CYP2D6 | CYP3A4*4 | CYP3A5   | CYSLTR2 | DAXX    | TNFSF11   |
| DDR2     | DENND1A   | DHFR     | DICER1 | DLL3     | DNMT3A   | DOT1L   | DPYD    | TOP1      |
| DTL      | DUSP2     | EGFR     | EIF1AX | EML4     | EP300    | EPAS1   | EPCAM   | TOP2A     |
| EPHA2    | EPHA3     | EPHA5    | ERBB2  | ERBB2IP  | ERBB3    | ERBB4   | ERCC1   | TP53      |
| ERCC2    | ERCC3     | ERCC4    | ERCC5  | ESR1     | ETV1     | ETV4    | ETV5    | TP63      |
| ETV6     | EWSR1     | EXT1     | EXT2   | EZH2     | EZR      | FANCA   | FANCC   | TPMT      |
| FANCD2   | FANCE     | FANCF    | FANCG  | FANCI    | FANCL    | FANCM   | FAT1    | TSC1      |
| FBXW7    | FGF19     | FGFR1    | FGFR2  | FGFR3    | FGFR4    | FH      | FLCN    | TSC2      |
| FLT1     | FLT3      | FLT4     | FOXA1  | FOXL2    | FOXO1    | FOXO3   | FOXP1   | TSHR      |
| FRG1     | GATA1     | GATA2    | GATA3  | GATA4    | GATA6    | GNA11   | GNAQ    | TTF1      |
| GNAS     | GREB1     | GREM1    | GRIN2A | GRM3     | GRM8     | GSTM1   | GSTM4   | TUBB3     |
| GSTP1    | GSTT1     | HDAC1    | HDAC2  | HDAC9    | HGF      | HLA-A   | HMOX1   | TYMS      |
| HNF1A    | HNF1B     | HOXB13   | HRAS   | HSPB1    | IDH1     | IDH2    | IFNA6   | U2AF1     |
| IFNB1    | IFNE      | IFNG     | IFNGR1 | IFNGR2   | IGF1R    | IGF2    | IKBKE   | UGT1A1    |
| IKZF1    | IL13      | IL1A     | IL7R   | INPP4B   | IRF1     | IRF2    | ITGB6   | UNG       |
| JAK1     | JAK2      | JAK3     | JARID2 | JUN      | KDM5A    | KDR     | KEAP1   | VAMP2     |
| KIF1B    | KIT       | KITLG    | KLLN   | KMT2A    | KMT2B    | KMT2C   | KMT2D   | VEGFA     |
| KRAS     | LHCGR     | LIG3     | LIG4   | LIN28B   | LMO1     | LRP1B   | LYN     | VHL       |
| LZTR1    | MALT1     | MAP2K1   | MAP2K2 | MAP2K4   | MAP3K1   | MAP3K4  | MAPK1   | WAS       |
| MAPK3    | MAX       | MC1R     | MCL1   | MDM2     | MDM4     | MECOM   | MED12   | WISP3     |

|          |        |         |         |         |         |        |          |        |
|----------|--------|---------|---------|---------|---------|--------|----------|--------|
| MEF2B    | MEN1   | MET     | MGMT    | MIF     | MITF    | MLH1   | MLH3     | WRN    |
| MLL1     | MLL3   | MLL4    | MMP1    | MPL     | MRE11A  | MSH2   | MSH6     | WT1    |
| MTAP     | MTHFR  | MTOR    | MTRR    | MUC5B   | MUTYH   | MYBL1  | MYC      | XPA    |
| MYCL     | MYCN   | MYD88   | MYH9    | NAT1    | NBN     | NCOR1  | NEIL1    | TAP2   |
| NF1      | NF2    | NFE2L2  | NFKB1   | NFKBIA  | NKX2-1  | NOS2   | NOS3     | TBK1   |
| NOTCH1   | NOTCH2 | NOTCH3  | NPM1    | NQO1    | NRAS    | NRG1   | NSD1     | TEK    |
| NTHL1    | NTRK1  | NTRK2   | NTRK3   | NUTM1   | PAK2    | PAK3   | PALB2    | TEK4   |
| PALLD    | PARK2  | PARP1   | PARP2   | PAX5    | PBRM1   | PDK1   | PDCD1    | TERC   |
| PDCD1LG2 | PDE11A | PDGFRA  | PDGFRB  | PGR     | PHOX2B  | PIK3C3 | PIK3CA   | TERT   |
| PIK3CD   | PIK3R1 | PIK3R2  | PKHD1   | PLAG1   | PLCB4   | PLK1   | PMAIP1   | TGFB1  |
| PMS1     | PMS2   | PNKP    | POLD1   | POLD3   | POLE    | POLH   | POT1     | TGFBR2 |
| PPARD    | PPM1D  | PPP2R1A | PPP2R2A | PRDM1   | PREX2   | PRF1   | PRKACA   | XPC    |
| PRKAR1A  | PRKCB  | PRKDC   | PRKCI   | PRSS1   | PRSS3   | PTCH1  | PTEN     | XRCC1  |
| PTK2     | PTPN11 | PTPN13  | QKI     | RAC1    | RAC3    | RAD50  | RAD51    | XRCC2  |
| RAD51B   | RAD51C | RAD51D  | RAD54L  | RAD9A   | RAF1    | RARA   | RARG     | XRCC3  |
| RASGEF1A | RB1    | RCC1    | RECQL4  | RELA    | RELN    | RET    | RHBDF2   | XRCC4  |
| RHOA     | RICTOR | RNF43   | ROS1    | RPTOR   | RRM1    | RUNX1  | RUNX1T1  | XRCC5  |
| SBDS     | SDC4   | SDHA    | SDHB    | SDHC    | SDHD    | 9-Sep  | SERPINE1 | YAP1   |
| SETBP1   | SETD2  | SF3B1   | SGK1    | SKP2    | SLC34A2 | SLC3A2 | SMAD2    | ZNF2   |
| SMAD3    | SMAD4  | SMAD7   | SMARCA4 | SMARCB1 | SMO     | SOCS1  | SOS1     | ZNF217 |
| SOX2     | SPOP   | SPRED1  | SPRY4   | SRC     | SRSF2   | SRY    | STAG2    | ZNF703 |
| STAT1    | STAT3  | STK11   | STMN1   | SUFU    | SUMO1   | TACC3  | TAP1     |        |

**Supplementary Table 2.** Univariate Cox regression analysis exploring clinical-pathological factors associated with progression-free survival.

| Characteristics        | Hazard ratio (95% CI) | <i>P</i> value |
|------------------------|-----------------------|----------------|
| Sex                    |                       |                |
| Female                 | Reference             |                |
| Male                   | 0.925 (0.412–2.077)   | 0.851          |
| Smoking                |                       |                |
| No                     | Reference             |                |
| Yes                    | 0.855 (0.440–1.661)   | 0.644          |
| ECOG                   |                       |                |
| 0                      | Reference             |                |
| 1                      | 3.188 (0.985–10.319)  | 0.053          |
| Pathology              |                       |                |
| LUAD                   | Reference             |                |
| LUSC                   | 1.032 (0.556–1.916)   | 0.920          |
| Others                 | 1.720 (0.579–5.114)   | 0.329          |
| Stage                  |                       |                |
| II                     | Reference             |                |
| IIIA                   | 0.660 (0.140–3.099)   | 0.598          |
| IIIB                   | 0.763 (0.179–3.248)   | 0.714          |
| IIIC                   | 1.060 (0.231–4.865)   | 0.940          |
| Initial tumor size, cm | 1.073 (0.934–1.233)   | 0.319          |
| T stage                |                       |                |
| 1                      | Reference             |                |
| 2                      | 1.372 (0.531–3.541)   | 0.514          |
| 3                      | 0.865 (0.345–2.169)   | 0.757          |
| 4                      | 1.262 (0.506–3.149)   | 0.617          |

|                                      |  |                     |       |
|--------------------------------------|--|---------------------|-------|
| N stage                              |  |                     |       |
| 0                                    |  | Reference           |       |
| 1                                    |  | 0.839 (0.139–5.065) | 0.848 |
| 2                                    |  | 2.026 (0.468–8.768) | 0.345 |
| 3                                    |  | 1.968 (0.457–8.463) | 0.363 |
| Baseline ctDNA abundance, ng/mL      |  | 1.155 (0.988–1.350) | 0.070 |
| Baseline ctDNA concentration, hGE/mL |  | 1.001 (1.000–1.002) | 0.199 |
| Baseline bTMB level, mut/Mb          |  | 1.012 (0.991–1.033) | 0.260 |
| Treatment cohort                     |  |                     |       |
| CRT                                  |  | Reference           |       |
| CRT + ICI                            |  | 0.468 (0.257–0.853) | 0.013 |

---

Abbreviations: bTMB, blood tumor mutational burden; CI, confidence interval; CRT, chemoradiotherapy; ctDNA, circulating tumor DNA; ECOG, Eastern Cooperative Oncology Group; ICI, immune checkpoint inhibitor; LUAD, lung adenocarcinoma; LUSC, lung squamous carcinoma.

**Supplementary Table 3.** Univariate and multivariate Cox proportional hazards regression of quantitative and qualitative biomarkers predicting progression-free survival.

| Characteristics      | Univariate analysis   |                | Multivariate analysis |                |
|----------------------|-----------------------|----------------|-----------------------|----------------|
|                      | HR (95% CI)           | <i>P</i> value | HR (95% CI)           | <i>P</i> value |
| Baseline ctDNA       |                       |                |                       |                |
| ctDNA –              | Reference             |                |                       |                |
| ctDNA +              | 1.150 (0.622–2.126)   | 0.657          |                       |                |
| Post-CRT ctDNA       |                       |                |                       |                |
| ctDNA –              | Reference             |                | Reference             |                |
| ctDNA +              | 3.303 (1.792–6.089)   | < 0.001        | 5.068 (1.009–25.461)  | 0.049          |
| Baseline ctDNA level | 1.001 (1.000–1.002)   | 0.199          |                       |                |
| Post-CRT ctDNA level | 1.005 (1.001–1.009)   | 0.019          | 0.994 (0.980–1.009)   | 0.456          |
| Dynamic ctDNA        |                       |                |                       |                |
| Decreased            | Reference             |                |                       |                |
| Stable               | 0.863 (0.449–1.659)   |                |                       |                |
| Increased            | 1.581 (0.599–4.171)   |                |                       |                |
| Baseline bTMB level  | 1.012 (0.991–1.033)   | 0.260          |                       |                |
| Post-CRT bTMB level  | 1.021 (1.002–1.041)   | 0.032          | 1.021 (0.994–1.049)   | 0.133          |
| Dynamic bTMB         |                       |                |                       |                |
| Decreased            | Reference             |                | Reference             |                |
| Stable               | 1.046 (0.525–2.084)   | 0.897          | 1.583 (0.700–3.581)   | 0.270          |
| Increased            | 20.082 (5.475–73.658) | < 0.001        | 11.382 (2.612–49.592) | 0.001          |

Abbreviations: bTMB, blood tumor mutational burden; CI, confidence interval; CRT, chemoradiotherapy; ctDNA, circulating tumor DNA; HR, hazard ratio.

**Supplementary Table 4.** Baseline characteristics of patients in the validation set.

| Validation set                      | Overall       | CRT        | CRT + ICI        | <i>P</i> * |
|-------------------------------------|---------------|------------|------------------|------------|
|                                     | n = 30        | n = 17     | n = 13           |            |
| Age, years, median (IQR)            | 60 (54–66)    | 62 (53–66) | 60 (57–62)       | 0.557      |
| Gender, n (%)                       |               |            |                  |            |
| Male                                | 25 (83)       | 14 (82)    | 11 (85)          | 1.000      |
| Female                              | 5 (17)        | 3 (18)     | 2 (15)           |            |
| Smoking, n (%)                      |               |            |                  |            |
| Current/former                      | 23 (77)       | 13 (77)    | 10 (77)          | 1.000      |
| Never                               | 7 (23)        | 4 (23)     | 3 (23)           |            |
| Histology, n (%)                    |               |            |                  |            |
| LUSC                                | 17 (57)       | 9 (53)     | 8 (62)           | 0.721      |
| LUAD                                | 13 (43)       | 8 (47)     | 5 (38)           |            |
| ECOG, n (%)                         |               |            |                  |            |
| 0                                   | 7 (23)        | 2 (12)     | 5 (38)           | 0.190      |
| 1                                   | 23 (77)       | 15 (88)    | 8 (62)           |            |
| Stage, n (%)                        |               |            |                  |            |
| II                                  | 5 (17)        | 4 (24)     | 1 (8)            | 0.355      |
| IIIA                                | 4 (13)        | 1 (6)      | 3 (23)           |            |
| IIIB                                | 12 (40)       | 8 (47)     | 4 (31)           |            |
| IIIC                                | 9 (30)        | 4 (24)     | 5 (38)           |            |
| PD-L1 status <sup>†</sup> , n (%)   |               |            |                  |            |
| ≥ 1%                                | 7 (64)        | 3 (75)     | 4 (57)           | 1.000      |
| < 1%                                | 4 (36)        | 1 (25)     | 3 (43)           |            |
| Baseline ctDNA, median (IQR)        |               |            |                  |            |
| ctDNA abundance, ng/mL              | 0.1 (0–0.7)   | 0 (0–0.3)  | 0.2 (0.1–0.7)    | 0.175      |
| ctDNA concentration, hGE/mL         | 34.4 (0–65.9) | 0 (0–76.3) | 47.2 (18.9–65.9) | 0.232      |
| Baseline bTMB, mut/Mb, median (IQR) | 1.5 (0–4.4)   | 0 (0–1.2)  | 2.9 (0.8–9.2)    | 0.055      |

\* Comparisons of baseline characteristics between patients treated with CRT and patients with CRT plus consolidation ICI.

¶ Nineteen patients had unknown PD-L1 expression data, including 13 in the CRT cohort and 6 in the CRT plus consolidation ICI cohort.

Abbreviations: bTMB, blood tumor mutational burden; CRT, chemoradiotherapy; ctDNA, circulating tumor DNA; ECOG, Eastern Cooperative Oncology Group; ICI, immune checkpoint inhibitor; IQR, interquartile range; LUAD, lung adenocarcinoma; LUSC, lung squamous carcinoma; PD-L1, programmed death–ligand 1.



**Supplementary Table 5.** Comparisons of baseline features between the discovery and validation sets.

| Characteristics  | Discovery set<br>(n = 73) | Validation set<br>(n = 30) | <i>P</i> value |
|------------------|---------------------------|----------------------------|----------------|
| Sex              |                           |                            |                |
| Male             | 61 (59.2%)                | 25 (24.3%)                 | 1.000          |
| Female           | 12 (11.7%)                | 5 (4.9%)                   |                |
| Smoking          |                           |                            |                |
| No               | 19 (18.4%)                | 7 (6.8%)                   | 0.775          |
| Yes              | 54 (52.4%)                | 23 (22.3%)                 |                |
| Pathology        |                           |                            |                |
| LUAD             | 30 (29.1%)                | 13 (12.6%)                 | 0.339          |
| LUSC             | 38 (36.9%)                | 17 (16.5%)                 |                |
| Others           | 5 (4.9%)                  | 0 (0%)                     |                |
| ECOG             |                           |                            |                |
| 0                | 13 (12.6%)                | 7 (6.8%)                   | 0.520          |
| 1                | 60 (58.3%)                | 23 (22.3%)                 |                |
| Stage            |                           |                            |                |
| II               | 3 (2.9%)                  | 5 (4.9%)                   | 0.079          |
| III              | 70 (68%)                  | 25 (24.3%)                 |                |
| Treatment cohort |                           |                            |                |
| CRT              | 36 (35%)                  | 17 (16.5%)                 | 0.498          |
| CRT + ICI        | 37 (35.9%)                | 13 (12.6%)                 |                |

Abbreviations: CRT, chemoradiotherapy; ECOG, Eastern Cooperative Oncology Group; ICI, immune checkpoint inhibitor; LUAD, lung adenocarcinoma; LUSC, lung squamous carcinoma.
